# Supplementary material for: Understanding Hearing Health: A Cross-Sectional Study of Determinants in a Metropolitan Area
Source: MDPI journal article supplement (doi:10.3390/healthcare11162253), 2023-08-10
Supplement: s1 [file s1]

The questionnaire used in this study.

**Anonymous questionnaire on knowledge, attitudes, and behaviors regarding hearing health.**

Participant n°: \_\_\_\_\_ Date: \_\_\_\_\_

(Please write X in front of the proper answer)

Age Gender: ☐ M ☐ F

Do you smoke? ☐ Yes ☐ No Are you single? ☐ Yes ☐ No

Do you have children? ☐ Yes ☐ No If yes, how many? \_\_\_\_\_

Educational level:

☐ Primary School ☐ High School

☐ Middle School ☐ University Degree

| <u>Knowledge</u>                                                                        | <u>Agree</u> | <u>Uncertain</u> | <u>Disagree</u> |
|-----------------------------------------------------------------------------------------|--------------|------------------|-----------------|
| 1. The ear is the organ of hearing.                                                     |              |                  |                 |
| 2. Cotton swabs are the safest way to clean your ears.                                  |              |                  |                 |
| 3. The removal of the earwax plug must be performed by the doctor.                      |              |                  |                 |
| 4. Scuba diving is dangerous for hearing.                                               |              |                  |                 |
| 5. Some medicines can cause hearing damage.                                             |              |                  |                 |
| 6. Otitis media is an ear disease.                                                      |              |                  |                 |
| 7. Otitis media can have neurological consequences.                                     |              |                  |                 |
| 8. Hearing loss only affects older people.                                              |              |                  |                 |
| 9. The audiometric test evaluates hearing ability.                                      |              |                  |                 |
| 10. The unit of sound measurement is the decibel (dB).                                  |              |                  |                 |
| 11. The risk threshold for hearing is about 80dB.                                       |              |                  |                 |
| 12. The limit values for noise pollution are defined by the DPCM * of 14 November 1997. |              |                  |                 |

| <u>Attitudes</u>                                              | <u>Agree</u> | <u>Uncertain</u> | <u>Disagree</u> |
|---------------------------------------------------------------|--------------|------------------|-----------------|
| 1. It is uncomfortable to wear earplugs.                      |              |                  |                 |
| 2. It is important to go for a morning run.                   |              |                  |                 |
| 3. It is nice to go clubbing with friends.                    |              |                  |                 |
| 4. Loud music gives the right energy.                         |              |                  |                 |
| 5. It is nice to have the TV on during meals.                 |              |                  |                 |
| 6. Earphones are more comfortable than speakers.              |              |                  |                 |
| 7. In summer it is best to dry your hair in the sun.          |              |                  |                 |
| 8. It is important to always have a sanitizer with you.       |              |                  |                 |
| 9. Reading the package insert of the medicines is useless.    |              |                  |                 |
| 10. It is useful to have your teeth cleaned every six months. |              |                  |                 |

| <u>BEHAVIORS</u>                              | <u>YES</u> | <u>OFTEN</u> | <u>SOMETIME</u> | <u>NEVER</u> |
|-----------------------------------------------|------------|--------------|-----------------|--------------|
| 1. Do you use cotton buds to clean your ears? |            |              |                 |              |

|                                                                             |  |  |  |  |
|-----------------------------------------------------------------------------|--|--|--|--|
| 2. Do you use ear sprays to clean your ears?                                |  |  |  |  |
| 3. Dry your ears with a clean towel after the bath?                         |  |  |  |  |
| 4. Do you swim in the pool or in the sea even if it is cold?                |  |  |  |  |
| 5. Do you use earplugs?                                                     |  |  |  |  |
| 6. During a conversation, do you turn the volume down on the TV or radio?   |  |  |  |  |
| 7. Do you happen to see fireworks shows up close?                           |  |  |  |  |
| 8. During events, do you go to quiet places to rest from high sound levels? |  |  |  |  |
| 9. Do you happen to stand near the speakers during a party?                 |  |  |  |  |
| 10. Do you turn up the audio volume with earphones?                         |  |  |  |  |
| 11. Do you fall asleep listening to music with earphones?                   |  |  |  |  |
| 12. In the last year, have you had a hearing check-up?                      |  |  |  |  |
